# Supplementary material for: Information literacy research of technical and vocational education and training in China in the past 10 years: a systematic literature review
Source: Frontiers journal article supplement (doi:10.3389/feduc.2024.1442650), 2024-09-24
Supplement: Data_Sheet_1.docx [file Data_Sheet_1.docx]

**Appendix A: List of Articles Reviewed**

| **No** | **Author(s)** | **Publish year** | **Main Findings** |
| --- | --- | --- | --- |
| 1 | Bai, X., & Yan, G.F. | 2020 | Explore questions about the impact on information literacy and on career acquisition for students in higher education, including significant positive and negative impacts. |
| 2 | Bian, D.D. | 2020 | Analyzing the needs of teachers' information literacy, defining the connotation of information literacy for teachers of senior accounting majors, constructing a model of information literacy for teachers of senior accounting majors, and further exploring the possible paths for the realization of information literacy for teachers of senior accounting majors. |
| 3 | Cai, J.J., Xu, J., Hong, S.L., & Ding, J.F. | 2022 | Higher vocational libraries investigate the current situation of students' information literacy, determine the target orientation, and propose the main measures to promote students' information literacy education from the libraries' point of view. |
| 4 | Cai, Y.Z. | 2020 | It puts forward the view that the cultivation of students' information literacy in the information age should become a new content of students' comprehensive quality cultivation, and puts forward the path of integrating the development of information literacy and comprehensive quality of higher vocational students. |
| 5 | Cai, Y.Z. | 2020 | Clarify the relevance of information literacy in the career development of students in higher education and propose four components to assist students in their career development. |
| 6 | Chen, L. | 2015 | Through the research on the status quo of information literacy education in higher vocational colleges and universities in Jiangsu Province, specific strategies for the development of information literacy education in higher vocational colleges and universities are proposed from the perspective of the trinity of society, schools and students. |
| 7 | Chen, L., & Yin, K.L. | 2023 | The content system of data and information literacy training is constructed from the four links of data and information demand, acquisition, cognition and application to help rural revitalization. |
| 8 | Chen, L.L. | 2014 | Taking Shanghai Institute Of Tourism as the object of research and practice, constructed a segmented information literacy competency target system and carried out information literacy education practice activities under the guidance of this system. |
| 9 | Chen, L.X., & Zhang, Q. | 2019 | Through the research to understand the status quo of information literacy of students in higher vocational colleges and universities in Hunan Province, we propose strategies to cultivate information literacy of students in higher vocational colleges and universities in Hunan Province from four aspects. |
| 10 | Ding, L.N., & Wang, P. | 2021 | Analyzing the Necessity of Information Literacy Improvement for Higher Foreign Language Teachers and Feasible Ways to Improve It. |
| 11 | Fang, Z.D. | 2017 | Teachers' information literacy in secondary vocational schools lags behind the needs of the development of vocational education informatization, analyzing the current situation of secondary teachers' information literacy in the region and proposing strategies to improve it. |
| 12 | Ge, Y.F. | 2020 | It describes the importance of information literacy education for students in higher vocational colleges and universities, and proposes multifaceted ways to implement information literacy education. |
| 13 | Guo, H. | 2023 | It discusses the components of information literacy of TVE teachers and explores the pathway of improving information literacy of TVE teachers from various aspects. |
| 14 | Hou, X.J., Liu, Y.S. & Lu, E.Y. | 2020 | Taking the national vocational education professional teaching resource library to carry out online teaching as the basic data, it comprehensively analyzes the status quo of teachers' information literacy in higher vocational colleges and universities under the three online teaching modes, and puts forward the strategy of promoting teachers' information literacy in higher vocational colleges and universities to improve their information literacy. |
| 15 | Ji, X.Z. | 2018 | The current situation of information literacy of manufacturing students in higher vocational colleges and universities is analyzed, the main problems existing at present are dissected, and the new requirements and ways and means of information literacy education for manufacturing students are discussed. |
| 16 | Ji, Y.R. | 2022 | It suggests that presenting students' information literacy should take some effective measures to integrate the teaching of the IT discipline with other disciplines, students' real life and with various competitions. |
| 17 | Ji, Y.W. | 2016 | By analyzing the current situation of information literacy education in higher vocational colleges and universities, it is proposed that information literacy education in higher vocational colleges and universities can be innovated through MOOC classroom. |
| 18 | Jian, S.J. | 2014 | By conducting an information literacy survey on the students of Dongguan Polytechnic, the enhancement pathway of making information literacy class as a general education course and the library as a long-term position for information literacy cultivation is proposed. |
| 19 | Kong, Q.L. | 2021 | To construct a model of influencing factors on the willingness of senior teachers to use information technology, to investigate the factors of senior teachers' willingness to use information technology, and to put forward suggestions for senior teachers' information literacy. |
| 20 | Lan, X.H. | 2022 | It analyzes the status quo of information literacy of economics and trade majors in higher vocational colleges and universities at the present stage, and proposes ways to improve the information literacy of higher vocational economics and trade majors. |
| 21 | Li,L., & Shi, Y.Q. | 2019 | Based on the research status of information literacy evaluation index system at home and abroad, a set of information literacy evaluation index system for students in higher vocational colleges and universities was constructed. |
| 22 | Li, L.,& Hao, J.Y. | 2019 | The importance of information literacy development is presented and the current status of information literacy among students in higher education institutions is investigated. |
| 23 | Li, Y. | 2019 | Analyze the important role of information literacy education in modern apprenticeship talent cultivation, and put forward specific implementation strategies to promote higher vocational information literacy education. |
| 24 | Liang, Z.D. | 2019 | Through the questionnaire survey, the current information literacy level of students in higher vocational colleges and universities is analyzed, and the work that needs to be done by libraries in higher vocational colleges and universities in improving the information literacy level of students as well as the strategies for improvement are proposed. |
| 25 | Liu, K.M., & Yao,C.Z. | 2019 | Analyze the current situation of information literacy enhancement of higher vocational teachers, and give the strategies to enhance the information literacy of teachers in higher vocational colleges and universities. |
| 26 | Ma, K.N. | 2022 | To point out the current situation of insufficient information literacy among teachers in secondary schools and to propose strategies for its cultivation. |
| 27 | Ma, X.H. | 2020 | To analyze the influencing factors of information literacy of teachers in higher vocational colleges and universities, and to provide research material for the pathway and evaluation of information literacy of teachers in higher vocational colleges and universities. |
| 28 | Mao, J., & Tang, X.Y. | 2020 | Based on the current situation of information literacy education in higher vocational colleges and universities in Hunan Province, strategies for optimizing and popularizing information literacy education are proposed. |
| 29 | Miao, Y,N. | 2023 | The significance of enhancing the information literacy of teachers in higher vocational colleges and universities, the problems and challenges faced by teachers in higher vocational colleges and universities and the strategies to enhance their information literacy. |
| 30 | Pan, G.Z. | 2015 | A survey on the current status of information literacy among middle school teachers and strategies to improve it. |
| 31 | Pi, J. | 2015 | To study the utilization of the advantages of modern information technology teaching modes and their integration with the teaching content of vocational education, so as to promote the cultivation of information literacy among vocational education students. |
| 32 | Song,G., & Kong,X.Y. | 2017 | Taking Wuxi Vocational Institute Of Commerce as an example, it investigates and researches the current situation of teachers' information literacy cultivation in higher vocational colleges and proposes relevant countermeasures to improve teachers' information literacy in higher vocational colleges. |
| 33 | Su, W. | 2019 | Information technology education is introduced, as well as ways to cultivate information literacy for students in vocational institutions in this context. |
| 34 | Tan, H.J., & Lv, J.Y. | 2019 | Analyze students' learning interests and learning effects, and propose two paths to develop students' information literacy and self-learning ability in basic computer courses. |
| 35 | Tang, Q. | 2019 | To investigate the current status of information literacy among public course teachers in a higher vocational institution, and to propose targeted training suggestions in terms of higher vocational institutions, curriculum construction, and teacher training. |
| 36 | Tian, C.F., Sun, J., & Wu, Y. | 2022 | Through a survey of information literacy education in some higher vocational colleges and universities in Jiangsu Province, a series of improvement measures are proposed to further enhance students' information literacy. |
| 37 | Wang, D. | 2020 | Based on the multiple dilemmas in the path of information literacy education in higher vocational education through the organization of national competitions, the proposal of "using competitions to promote teaching" is put forward. |
| 38 | Wang, L.L., & Song, X.Q. | 2019 | The current status of information literacy among senior teachers was investigated from three aspects: teaching information literacy, research information literacy and practice information literacy. |
| 39 | Wang, L.L., & Song, X.Q. | 2019 | Analyzing the current situation of information literacy of higher vocational teachers and giving suggestions on the improvement of teachers' information literacy from macro, meso and micro aspects. |
| 40 | Wang, X.G. | 2018 | Propose methods and countermeasures for the information literacy development of art higher vocational students through strengthening information literacy publicity, improving the database, and upgrading teachers' information literacy. |
| 41 | Wen, M.D., & Huang, J.Q. | 2021 | Analyze the deficiencies of art teaching curriculum in secondary vocational education in China at this stage, and put forward some strategies to improve the information literacy of secondary art teachers based on the concept of STEAM education. |
| 42 | Weng, C.P., & Li, J.C. | 2015 | From the 3 aspects of schools, teachers and libraries, the problems of the content and mode of higher vocational information literacy education are analyzed, and countermeasures to do a good job of higher vocational information literacy education are put forward. |
| 43 | Wu,B. | 2017 | To investigate the current situation of information literacy of college students' readers in Lianyungang Technical College, and to propose methods to improve college students' information literacy. |
| 44 | Wu, X.J. | 2021 | The information literacy of students in five secondary vocational schools in Guangdong Province was investigated, and the differences in information literacy were analyzed in depth. Suggested strategies to improve the information literacy of students in secondary vocational schools are presented. |
| 45 | Xi, M.L., Hu, J.P., & Wu, Z.M. | 2023 | Strategies for constructing an information literacy index system for teachers in higher vocational colleges and universities to improve their information literacy. |
| 46 | Xiao, X. | 2021 | It points out the necessity of information literacy for teachers of Civics and Political Science courses, analyzes the obstacles to the enhancement of information literacy, and explores practical and effective cultivation paths. |
| 47 | Xiong, X.B., Deng, L., Cai,Y.M., & Yan,Z.J. | 2022 | Based on the TPACK framework, the current information literacy status of secondary students is explored, and the following suggestions are made: deepen the integration of industry and education fusion, carry out curricular and pedagogical reforms, and improve the construction of digital campuses. |
| 48 | Xu, G.Q. | 2015 | It describes the relationship between informatization of education and teachers' information literacy, and points out that teachers' information literacy is a basic prerequisite for implementing and promoting the informatization of teaching and learning. |
| 49 | Yao,Y. | 2019 | Suggests ways for vocational schools to enhance students' information: gathering the energy of the teaching staff, using interactive forms of open teaching, and relying on the IPv6 platform to lay the foundations for information literacy education. |
| 50 | Ye, H. Q. | 2019 | Explored ways to utilize professional resource libraries to enhance information literacy among higher education students. |
| 51 | Yin, F.M. | 2019 | Criteria for the development of information literacy in higher education are formulated, and how to carry out the development of information literacy in higher education students is proposed. |
| 52 | Yin, Z.P. | 2015 | Starting from the process of vocational development and the requirements of information literacy for secondary school students, the impact of information literacy on vocational development of secondary school students was discussed. |
| 53 | Yu, K.,& Yao, S.C. | 2017 | The articulation of middle and high school has a direct impact on the improvement of the level of vocational education, and it is necessary to learn to use information to strengthen the connection between jobs and careers, and to design a training plan with levels of middle and high school comprehensive information literacy skills. |
| 54 | Yuanfei Ge | 2015 | The article discusses the integration of information technology and curriculum from the concept of "dual system" vocational education, and the development of students' information literacy through the integration of information technology and curriculum. |
| 55 | Yue, S.L., & Zou, X.H. | 2021 | Investigating information literacy in higher education institutions and proposing strategies for students to improve information literacy. |
| 56 | Zhang, J. | 2014 | It analyzes the requirements of information literacy of higher vocational students under the information technology teaching mode, proposes to improve the information literacy of teachers, improve the teaching content of information literacy, and strengthen the construction of hardware and software. |
| 57 | Zhang, X.H. | 2020 | It is proposed that vocational colleges and universities can develop students' information literacy through "technology as the foundation, standards as the guide, curriculum as the backbone, and teachers as the support". |
| 58 | Zhang, Z. | 2020 | The article analyzes the current situation of teaching information technology courses in secondary education and proposes effective teaching strategies conducive to the cultivation of information literacy. |
| 59 | Zhao, H.S., & Chen, Y.L. | 2016 | The connotation of information literacy of senior counselors is analyzed, and the self-improvement strategy of information literacy of senior counselors is discussed. |
| 60 | Zheng，B. | 2022 | Connotation, current situation and ways to improve the information literacy of business tutors in higher vocational colleges and universities. |
| 61 | Zhu, T.T. | 2021 | Construct a competency framework for information literacy of higher vocational students, form a questionnaire to investigate the current status of information literacy of higher vocational students based on the competency framework, and put forward a proposal for a progressive cultivation mechanism to improve the information literacy competency of higher vocational students. |

# Reference

Bai, X., Yan, G.F., 2020. Information Literacy and Career Acquisition of Vocational College Students in 5G Era: Reality, Challenges, and Countermeasures. Chinese Vocat. Tech. Educ. 27, 17–21. https://kns-cnki-net-s.webvpn.wzvtc.cn/kcms2/article/abstract?v=WdAl4K16JyUf7ld4jghAkStO1aI_7u4-k6d_f1ga31EQdP9XcrWVepfRTD9ZNFWwIZHFmiL_gzrhpQhsqAgCkA0WHFLszxcdNk5qJuG6G8_gFfi3txSe9ZtMZh7RRtFoNqqc2D04S_M=&uniplatform=NZKPT&flag=copy

Bian, D.D., 2020. Research on the Connotation, Model and Realization Path of Information Literacy of Higher Vocational Teachers under Smart Education--Taking Higher Vocational Accounting Teachers as an Example. J. Taiyuan Urban Vocat. Coll. 96–98. https://doi.org/10.16227/j.cnki.tycs.2020.0844

Cai, J.J., Xu, J., Hong, S.L., Ding, J.F., 2022. Deep Cultivation of Information Literacy to Help Quality Improvement and Excellent Training Action -- An Innovative Practical Case and Enlightenment of Library Service in Zhejiang Business College. J. Tianjin Vocat. Inst. 31, 76–82. https://qikan.cqvip.com/Qikan/Article/Detail?id=7107551336&from=Qikan_Article_Detail

Cai, Y.Z., 2020. Information Literacy and Career Development of Students in Higher Vocational Colleges and Universities in the Information Age. Ind. Innov. 159–160. https://kns-cnki-net-s.webvpn.wzvtc.cn/kcms2/article/abstract?v=WdAl4K16JyUAAYag-joF2HjPCB0djHQKBb1Irt2ZNgh3fHBbI8W8ypNm-1vQTXNBogHP0eN_Q-TW37ipGxMy_Z2aH_fgw6Hwx2HB9mcAiAjoOhkcktVkhmc0qTn9nDAcxLwifwaMCpg=&uniplatform=NZKPT&flag=copy

Cai, Y.Z., 2020. The Integrated Development of Information Literacy and Comprehensive Quality of Higher Vocational Students in the Information Age. China New Telecommun. 22, 162–163. https://kns-cnki-net-s.webvpn.wzvtc.cn/kcms2/article/abstract?v=WdAl4K16JyVTN9vcujS8jBeHm46icPv0Vz6Oo72tPtTvw1HMTF0Slkmcf9-ce0r229Hdw0eWo82HV9wY3uYZGC9lqkVmK__HWPYi51zyj9KEUmQihuJJcT2nZxwwzbsSbSJQQZMLsNc=&uniplatform=NZKPT&flag=copy

Chen, L., 2015. Research on Information Literacy Education in Higher Vocational Colleges under the Background of Modern Vocational Education System. Jiangsu Sci. Technol. Inf. 34–36. https://kns-cnki-net-s.webvpn.wzvtc.cn/kcms2/article/abstract?v=WdAl4K16JyUonR96JsIDbLQQovPqiIj7Eii8NdZsLkA0S200UGLcV_PpAhgoXzLoRFmTg2Cwa7d6yHbpFaCq_phaRblUpCB29lBMnVXkv8BdG8iuf9XfTwRCt9yYGDUtD9-wXb-X19Y=&uniplatform=NZKPT&flag=copy

Chen, L.L., 2014. Construction and Practice of Cascade Segmented Information Literacy Training Model -- Taking Shanghai Institute of Tourism as an Example. Vocat. Tech. Educ. 35, 14–17. https://kns-cnki-net-s.webvpn.wzvtc.cn/kcms2/article/abstract?v=WdAl4K16JyWDKCNqp6fseQRbQOmSdK8mv9JRcjFRffoJPd0EKBVp-oLFJBusGb_JuXWvJOuG4EE3MJWM0UEQMXmVPFO220Fm5OeBIWm78NPjN9C_TxTSiCvehEiRUNsz&uniplatform=NZKPT&flag=copy

Chen, L.X., Zhang, Q., 2019. Current Situation and Cultivation Countermeasures of Information Literacy of Students in Higher Vocational Colleges and Universities in Hunan Province. Stat. Manag. 90–95. https://doi.org/http://doi.org/10.16722/j.issn.1674-537x.2019.06.016

Chen, L., Yin, K.L., 2023. Research on Information Literacy Cultivation System for Students in Vocational Colleges and Universities -- Based on the Perspective of Rural Revitalization. Guizhou Agric. Mech. 54–57. https://kns-cnki-net-s.webvpn.wzvtc.cn/kcms2/article/abstract?v=WdAl4K16JyVHV38nT8v9kj4SqC6wtWW7MoZcJ6LL-VvnDnkKBWXwzV7z51keDFZ4JTr89H8JRKE2rY0Hi9KAn4vpdmyLCgXcRt1Zfr2uH3jNVXN70emwy_v_OgskCDgwzBVjRfLJACk=&uniplatform=NZKPT&flag=copy

Ding, L.N., Wang, P., 2021. Exploration of Information Literacy of Vocational College Foreign Language Teachers in the Context of Artificial Intelligence. China J. Multimed. Netw. Teach. 166–168. https://kns-cnki-net-s.webvpn.wzvtc.cn/kcms2/article/abstract?v=WdAl4K16JyXMufYRXlMP-OJRbTVW8bJ8wIYaio4OD-3LKz6RwvXJS-lpUPCVachcbIfuGtv2yp69VfoNugcJaJH0MuaNVoV78f30dGkIXPeZbHJQj8lmfwE9zcIkeRPbSPpr34-k_PU=&uniplatform=NZKPT&flag=copy

Fang, Z.D., 2017. Strategies for Improving the Information Literacy of Secondary School Teachers. Chinese J. ICT Educ. 79–82. https://kns-cnki-net-s.webvpn.wzvtc.cn/kcms2/article/abstract?v=WdAl4K16JyVU8-utMWOf7mRDQnudbNNIrM5Q68GBsf-jSfqQEIniQaWnCwJACpUQiaNnpt8L8K4GkAaSVnpi5wc9Ueu4oTmhShvvRBlQezfXgfno29Rlauag61A53jTzRkRnMBJEzaw=&uniplatform=NZKPT&flag=copy

Ge, Y.F., 2015. On the Assumption of Integration of Information Literacy Education into Xinjiang Vocational Education System. J. Xinjiang Vocat. Univ. 23, 12–16. https://kns-cnki-net-s.webvpn.wzvtc.cn/kcms2/article/abstract?v=WdAl4K16JyXAHJL4w4MlOFga7py8yNFn3tfAXkEf0waLkzIS1Y0KQcIrIRIBj8olKUwNA3xobYYN3S2ZyMaNxKXEu2NdKP0MzospXanhbw5qGlzxJ_R-J616YCpCEVTMXqJalc07CSE=&uniplatform=NZKPT&flag=copy

Guo, H., 2023. Research on the Composition and Improvement Path of Information Literacy of Vocational College Teachers under the Background of Artificial Intelligence Era. Vocat. Technol. 22, 52–57. https://doi.org/10.19552/j.cnki.issn1672-0601.2023.07.008

Hou, X.J., Liu, Y.S., Lu, E.Y., 2020. Analysis and Improvement of Teachers’ Information Literacy in Higher Vocational Colleges from the Perspective of Epidemic Situation -- Based on Monitoring Operation Data Analysis of 203 Professional Teaching Resource Databases on National Vocational Educa. Jiangsu High. Vocat. Educ. 20, 1–7. https://doi.org/10.15903/j.cnki.jniit.2020.02.001

Ji, X.Z., 2018. Information Literacy Training Cultivation in the Background of Made in China 2025. Theory Pract. Innov. Entrep. 1, 66-68+83. https://kns-cnki-net-s.webvpn.wzvtc.cn/kcms2/article/abstract?v=WdAl4K16JyUbOy-_VRjiSCoJSbsjvwGH9siNM6cqyGgvlMbFP6qHFnEsXdtZV3a6ifVkRhwuxQAUCT5gjcY4yE8tI8c6J1LkhEu-XGMNQ1_zozl9F1pSIsmId6sLS2wOGf8zmVtH-BI=&uniplatform=NZKPT&flag=copy

Ji, Y.R., 2022. Three Integrated Strategies for Enhancing Students’ Information Technology Literacy in Vocational Education. Occupation 33–35. https://kns-cnki-net-s.webvpn.wzvtc.cn/kcms2/article/abstract?v=WdAl4K16JyVz3J-1j7rG6ueQKPiVIM4TWjxAJnDRStq11voxKDC1Yy2ZOp_p7iklDyqzBIAEMKwi4hVZDMLd7HdYm_scxXqxAB9_pwwOgNdk8YhDUJuAlE5rAF8z8NBD9hsMsafUltI=&uniplatform=NZKPT&flag=copy

Ji, Y.W., 2016. Information Literacy Instruction in Higher Vocational Colleges under the Background of MOOC. J. Libr. Inf. Sci. Agric. 28, 141–144. https://kns-cnki-net-s.webvpn.wzvtc.cn/kcms2/article/abstract?v=WdAl4K16JyWq8DKJhHDUKoj3PLuwr_ZW5Qsye9ywIsYnTHsa_sKoR3_ZkzW5JcbEAXyrmqzK9VvH2xEjvfF6zDSiJISdaLd_q9GfSkSR-36hEUBy4WXpRqws8PYQfn7ReJAuHFFMLEM=&uniplatform=NZKPT&flag=copy

Jian, S.J., 2014. On Information Literacy Education in Higher Vocational Colleges and Universities -- A Survey on Information Literacy of Students Based on Dongguan Polytechnic. Inn. Mong. Sci. Technol. Econ. 120–122. https://kns-cnki-net-s.webvpn.wzvtc.cn/kcms2/article/abstract?v=WdAl4K16JyUwCqPrHk29hHvF9gB6PgmDqqs3HUBmqK1LjQEvmYFBWgA5qCQR10pbZg8Llm4-4VpvHslNWeGe7zHjE-AHoWdfssyxqJNF8TdK8S6bgBaMXjNMr_eU5rvf&uniplatform=NZKPT&flag=copy

Kong, Q.L., 2021. Research on the Enhancement of Information Literacy of Vocational College Teachers under the Background of Lifelong Learning -- A Perspective Based on the UTAUT Model. J. Shandong Open Univ. 13–20. https://kns-cnki-net-s.webvpn.wzvtc.cn/kcms2/article/abstract?v=WdAl4K16JyVP7FgH5SoMkC6Q1nhiJHY2fECVCFI-WODlcyHwIF8Zqc9PRSVj35nAx-WQvr2NTy1RtiwO86yLLD0mdQb29vKsHbEoJjdAvg4lNyAyTOw-eRclI0agIQHogT7P2EaQLTk=&uniplatform=NZKPT&flag=copy

Lan, X.H., 2022. Research on the Cultivation of Information Literacy of Economics and Trade Majors in Higher Vocational Colleges and Universities. North. Econ. Trade 131–132. https://doi.org/pA8OjRbfJ9GszYiTIGu36PPzlAkLu01NuoCS7RokGvNjsDSnDQfSbbuXovc4Gz9CTE4hMsfNE5UnnfgpVlaNZXrAlOd_AAwM4xHwwhpC5fMYrWrP2i1NvI=&uniplatform=NZKPT&flag=copy

Li, L., Hao, J.Y., 2019. Analysis of the Current Situation of Information Literacy of Students in Higher Vocational Colleges and Universities under the Condition of Informatization. Think Tank Era 113–115. https://kns-cnki-net-s.webvpn.wzvtc.cn/kcms2/article/abstract?v=WdAl4K16JyX_CQPWtLt0tRCmrua414EVcaxJfetAVVq_XfKBYpSGDf_iFyEnZJ4kOz4Ucq0G_nXyvYTzfM2aGBWJ7qaaSbHTpT8HQNchYYqOHGyAyQs3agB6V_3oACxKALm8yz0YVNA=&uniplatform=NZKPT&flag=copy

Li, L., Shi, Y.Q., 2019. The Construction of Information Literacy Evaluation Indicator System for Students in Higher Vocational Colleges and Universities under Informatization Conditions. Knowl. Econ. 116–117. https://doi.org/http://doi.org/10.15880/j.cnki.zsjj.2019.10.073

Li, Y., 2019. Study on Effect of Information Literacy Education on Modern Apprenticeship and Its Implementation Strategy. J. Beijing Polytech. Coll. 18, 67–70. https://kns-cnki-net-s.webvpn.wzvtc.cn/kcms2/article/abstract?v=WdAl4K16JyVzR82BmgZLYBD_QsSZQRvLstjMSl0iXCcU8E24BOpNqCFnGXe2xhmfOaJl7sBxiBcfVK6K7yZnAPcKP3gr6Xhhlw1Y_Mj_VRtgVXctZugveM7GC8EaZ_a8DjW2MeYx7Wc=&uniplatform=NZKPT&flag=copy

Liang, Z.D., 2019. How Higher Education Libraries Can Improve Student Information Literacy Education. Mod. Econ. Inf. 434. https://kns-cnki-net-s.webvpn.wzvtc.cn/kcms2/article/abstract?v=WdAl4K16JyWcRiRUsNtZoRKnk-F8wxHj4P-Dg4eF2vUrXjXl4vSZY8Wqm5ZQlKnmvgY6i_1arVpz-zGeFpZYk0BnCvS5TPyN8Wr7UuwiFUKY9X_kjyyFKLdT5Ro9oLA1chp789cTOnw=&uniplatform=NZKPT&flag=copy

Liu, K.M., Yao, C.Z., 2019. Research on the Enhancement of Information Literacy of Vocational College Teachers under the Background of Artificial Intelligence. Mod. Vocat. Educ. 44–45. https://kns-cnki-net-s.webvpn.wzvtc.cn/kcms2/article/abstract?v=WdAl4K16JyU8DP_DcLlv3DYExy0Bwsy_hioPNCtEBSRVnsyZJ9V6bIDXO58WwXKuhPOiNTocE6Gan99KQJIePfJ6Nx03WAR9ZX7D-h3QoiZHTDkKNPKDSpX2p86EaQ1lfkFFUv2ZzGw=&uniplatform=NZKPT&flag=copy

Ma, K.N., 2022. Dilemmas and Cracks in Cultivating Information Literacy among Secondary Teachers in the Age of Mathematical Intelligence. Occupation 24–27. https://kns-cnki-net-s.webvpn.wzvtc.cn/kcms2/article/abstract?v=WdAl4K16JyXCQKXJb__4fliiOaCtdzre5Xc0O2HK5fXW_vJpvs1W40JqRGuLzJzzuBh4kpG5ZhU45f4BB_lJ0BNX0v3ylEejoY3rQCFhWLoxm3LCdOzG-jmHomPDXsrel_eoC1fHFTg=&uniplatform=NZKPT&flag=copy

Ma, X.H., 2020. Analysis of Factors Influencing Information Literacy of Vocational College Teachers. J. Green Sci. Technol. 248–249. https://doi.org/10.16663/j.cnki.lskj.2020.03.099

Mao, J., Tang, X.Y., 2020. Reflections on Information Literacy Education Issues and Development Paths in Higher Vocational Colleges and Universities--An Analysis of Data Based on the Information Literacy Competition of Higher Vocational Colleges and Universities in Hunan Province i. Libr. Work Coll. Univ. 40, 85–88. https://kns-cnki-net-s.webvpn.wzvtc.cn/kcms2/article/abstract?v=WdAl4K16JyUULniGPKddB-MxnJu21zIynciP9ioi7RebMjtLLn5--7u_9Au_PctMh6-Z0iqPFdUD-wCbcoilABfBWnt3A_fxrtTAtkRjpPXIGasKu0HXMr4WYp6O6C2X6Vp0dONRDO8=&uniplatform=NZKPT&flag=copy

Miao, Y.N., 2023. Research on Strategies for Improving Teachers’ Information Literacy in Higher Vocational Colleges and Universities under Informatization Environment. China CIO News 105–107. https://kns-cnki-net-s.webvpn.wzvtc.cn/kcms2/article/abstract?v=WdAl4K16JyWE75hOW0AChqnI6k3KieVGPgNm6Q0KTLrRAUg9Ka9u7CY7Hqir8t74qYG2Qg9aeKZbD0dDWUFiYuRT0lUckkB50Ne_tEMjR2n1-urVvxJyhon0E6Wsyxsc3-WfsTh3zas=&uniplatform=NZKPT&flag=copy

Pan, G.Z., 2015. Investigation and Enhancement Strategies of Information Literacy of Vocational School Teachers in the Context of Educational Informatization. Occupation 11. https://kns-cnki-net-s.webvpn.wzvtc.cn/kcms2/article/abstract?v=WdAl4K16JyWZCzUBQU2xC_1HSmkEeg3FDMjSmpJYHG3gSUWa8GgyCOGOTUdSqxwZT0D1vDCHwQ40-zY7uVsbXvgU7setb759hD4bh0R3Lzx-PY8Cqct2OSiYOkRoEDJPbV6nOF3YR4o=&uniplatform=NZKPT&flag=copy

Pi, J., 2015. Modern Information Technology Teaching Models to Promote the Cultivation of Information Literacy in Vocational Education Students. Softw. Guid. 14, 57–58. https://doi.org/http://doi.org/10.16735/j.cnki.jet.2015.02.020

Song, G., Kong, X.Y., 2017. Research on the Current Status Investigation and Training Strategies of Information Literacy of Vocational College Teachers: A Case Study of Wuxi Vocational Institute of Commerce. J. Kaifeng Vocat. Coll. Cult. Art 37, 171–172. https://doi.org/10.3969/j.issn.1008-9640.2017.02.077

Su, W., 2019. Information Education Policy and Cultivation of Information Literacy of Vocational College Students. J. Shanxi Radio TV Univ. 24, 24–28. https://kns-cnki-net-s.webvpn.wzvtc.cn/kcms2/article/abstract?v=WdAl4K16JyWlw6tkPzVGgjSjjtCiKF_JFLlhz7Kdy4Syf92OMXAhF_Agm_s_fTWRIT0bH2l91ZPRwMlLLEdeeAiahoFmhVDPWzUIYbKocAs5OrCeK8Q0LkTtIbU-Mask6zX1wQZv54g=&uniplatform=NZKPT&flag=copy

Tan, H.J., Lv, J.Y., 2019. Analysing the Cultivation of Students’ Information Literacy and Self-learning Ability in Teaching -- Taking the Teaching of Higher Vocational Computer Application Foundation Course as an Example. China New Telecommun. 21, 181–182. https://kns-cnki-net-s.webvpn.wzvtc.cn/kcms2/article/abstract?v=WdAl4K16JyUMgBBchGWOnvNvGwR12vTmBnU-SdUbk_ixdpVJXzuPnLUP033o33i2wOpfptsAH9PON6n89MYEsWFbnM7wfGD-6TPIrNIRoCvgLXNsXXbEuESh6dtZ3x1GbR_4vq2ln68=&uniplatform=NZKPT&flag=copy

Tang, Q., 2019. Research on the Current Situation of Information Literacy and Cultivation Strategies of Higher Vocational Public Course Teachers. Mod. Vocat. Educ. 136–137. https://kns-cnki-net-s.webvpn.wzvtc.cn/kcms2/article/abstract?v=WdAl4K16JyV3o4m9tWJ2G-v-bdPm-N6O6ZZSsUFctzGu5MQ17fWNIrSJwXJdVsDighTvAVVzUNNtnjYYjYOoFZu7wBSyBjl9WvKyVEjrZLwDff1lewwRF4t5tX2TMH4hLE8hA7bxpB4=&uniplatform=NZKPT&flag=copy

Tian, C.F., Sun, J., Wu, Y., 2022. Research on the Current Situation and Improvement Strategies of Students’ Information Literacy in Higher Vocational College. J. Tianjin Vocat. Inst. 31, 34–35. https://kns-cnki-net-s.webvpn.wzvtc.cn/kcms2/article/abstract?v=WdAl4K16JyWfl_0PWcx62DnHLXNfg3LXQ0yzOGNmqiqMyBGUI1v0u4CxiLFt-YtzqQV8jVVNcHU2F5fhLNYidW3wssp_C1z8uczB8ZfPQJooW9NXZ5E1fKfCR6ps0jGxAQaeOSZIDN0=&uniplatform=NZKPT&flag=copy

Wang, D., 2020. Reflections on a Higher Education Information Literacy Competition from a Core Literacy Perspective. Shaanxi Educ. 44–46. https://doi.org/10.16773/j.cnki.1002-2058.2020.09.021

Wang, L.L., Song, X.Q., 2019. Research on Higher Vocational Teachers’ Information Literacy. Educ. Teach. Forum 22–25. https://kns-cnki-net-s.webvpn.wzvtc.cn/kcms2/article/abstract?v=WdAl4K16JyWDCCcR9R89pySv_hnRCS5jrm-5e3bA7mmqXyu_DQwAqsGJvadeAvMzxscEHNDZj1VBpqS6NulsF3r90BkH82CS0jPbMOm9_3UzzJJvIny4nSejE7oEDSy7JrQKlFjTFX4=&uniplatform=NZKPT&flag=copy

Wang, L.L., Song, X.Q., 2019. Research on the Enhancement of Information Literacy of Vocational College Teachers under the Background of “Internet Plus Education.” Chinese J. ICT Educ. 73–76. https://kns-cnki-net-s.webvpn.wzvtc.cn/kcms2/article/abstract?v=WdAl4K16JyXyEqaZ-omukhQOiHgXEYerd_IX5EPB1LUs1__hs3UHim-1aC25NsHzNGz_IrBwiQC2XnmfMjCsAefDwZXy2nOlvAxCxQg3qn0Pyk-jb4PDT_1oYsiHtbDRF6ZNfmlWxG0=&uniplatform=NZKPT&flag=copy

Wang, X.G., 2018. Exploring the Cultivation of Information Literacy of Art Higher Vocational Students in Smart Campus Environment. J. Educ. Technol. 17, 83–84. https://doi.org/10.16735/j.cnki.jet.2018.09.030

Wen, M.D., Huang, J.Q., 2021. Research on Information Literacy Enhancement Strategies for Art Teachers in Secondary Vocational Education Based on the Concept of STEAM Education. J. Guangxi Open Univ. 32, 82–85. https://kns-cnki-net-s.webvpn.wzvtc.cn/kcms2/article/abstract?v=WdAl4K16JyVQBGuLfE5H6jLniZaYO3ALs1Vs1U1MOquY8Qt5AMSfra-G9a3AB94LtTsjX85TkXz4kc6uOm48m-U6OuQ6xqG_Hg3hqa5yZsFvaMCbWEHUAgnpmeLaaOqBu-szFx2Llzk=&uniplatform=NZKPT&flag=copy

Weng, C.P., Li, J.C., 2015. Exploring Information Literacy Education in Higher Professions. J. Libr. Inf. Sci. 25, 150–152. https://kns-cnki-net-s.webvpn.wzvtc.cn/kcms2/article/abstract?v=WdAl4K16JyWNQcCWLxrSFQU7IYflUG2ZycZYsaZqe0wLrB_KNKxFlOmkXDzxJnbUogaz7ozZHNK3BoH4IkrmMyisYnNSJCA_XCXVJWJaAoBDSXIERwqDsnv9wBXppCOafR6qRv70H_o=&uniplatform=NZKPT&flag=copy

Wu, B., 2017. Empirical Study on Information Literacy of Higher Vocational College Students: A Case Study of Lianyungang Technical College. J. Jiangsu Ocean Univ. 15, 130–133. https://kns-cnki-net-s.webvpn.wzvtc.cn/kcms2/article/abstract?v=WdAl4K16JyUfmmqdQzH7pZsBYV6Lu62KUw4T40JTFTyMrDxt96sEurvhN0juq3I46PM9cW3s3l_NIqiVavyk_eKgfDhqH4aX7LKwXjT1LfQanKGlTiHSOfuQXSKWxDbn93eCMG-CISo=&uniplatform=NZKPT&flag=copy

Wu, X.J., 2021. A Study on Information Literacy Survey and Cultivation Strategies for Secondary School Students -- A Case Study of 5 Schools in Guangdong Province. Vocat. Educ. 20, 47–54. https://doi.org/10.13565/j.cnki.issn2095-4530.2021.11.006

Xi, M.L., Hu, J.P., Wu, Z.M., 2023. The Realistic Dilemma of Information Literacy Enhancement of Teachers in Higher Vocational Colleges and Universities and Strategies for Breakthroughs. Vocat. Tech. Educ. 44, 50–55. https://kns-cnki-net-s.webvpn.wzvtc.cn/kcms2/article/abstract?v=WdAl4K16JyUm9sls3z_cD88Zf4enZ5R62hnsbupp4fsNHnw5CAr9CVCHOxYg7SpR6QMVMG-xFWpscvsfd3-wen4BXKi4_0FwjIpwttwDwH4UGY8HwRY_x_y21NVNm91mR9JIbp2WD0c=&uniplatform=NZKPT&flag=copy

Xiao, X., 2021. On Improving the Information Literacy of Ideological ＆ Political Theory Course Teachers at Higher Vocational Colleges While Improving Quality & Cultivating Excellence. J. Guizhou Radio& TV Univ. 29, 17–22. https://doi.org/10.19505/j.cnki.1008-2573.2021.03.007

Xiong, X.B., Deng, L., Cai, Y.M., Yan, Z.J., 2022. An Empirical Study on Enhancing the Information Literacy of Secondary School Students under the Framework of TPACK -- A Case Study of Four Secondary Schools in Guangxi Region. Surv. Educ. 11, 100-103+121. https://doi.org/10.16070/j.cnki.cn45-1388/g4s.2022.23.003

Xu, G.Q., 2015. Exploring the Relationship between Vocational Education Informatization and Teacher Information Literacy. Educ. Teach. Forum 32–34. https://kns-cnki-net-s.webvpn.wzvtc.cn/kcms2/article/abstract?v=WdAl4K16JyX2fkfEYMomHUEs9a3Bzg11Qbn9td1yjt2GKPCyAacdkyUP5cHYKUvirD7iI5zD9WnM1GGVLd_kVYuUvODrKJEC5zUTn1iqnH-5jSAsgIokKu8hWCQNfDenqdJJCP_l3N8=&uniplatform=NZKPT&flag=copy

Yao, Y., 2019. Information Literacy Promotion Strategies for Secondary Vocational Students in the Context of Informatization 2.0. Mod. Vocat. Educ. 140–141. https://kns-cnki-net-s.webvpn.wzvtc.cn/kcms2/article/abstract?v=WdAl4K16JyUtQDB_cVe8lTzW9iozk_Ym3NjzuYA-74B-jXlSYxHpLxUEU_V_sWDm-nCMk8t0neMNNGAFfkTtAHpPs0KkvFJFumdcmCvFfpQkHw149ZtQQWsTElHbPSWX6_CYkG3rC8Y=&uniplatform=NZKPT&flag=copy

Ye, H.Q., 2019. Research and Exploration on the Improvement of Information Literacy of Higher Vocational College Students. J. Liaoning High. Vocat. 21, 96–100. https://kns-cnki-net-s.webvpn.wzvtc.cn/kcms2/article/abstract?v=WdAl4K16JyWCoW9qqPoJ4UNqITAOVe-42Wo5TGqjHklzPZtOX-DscWLYZ5Ult7MG9KTMiIfl01UN9DQ8eJMickONvCMfNTAbh4qdGkQVo24kOzH4hQ41Cu9vVQL80oJUU7trsv9D5eQ=&uniplatform=NZKPT&flag=copy

Yin, F.M., 2019. Research on the Standards of Information Literacy Training in Higher Vocational Education. Guid. Sci. Educ. 50–51. https://doi.org/10.16400/j.cnki.kjdks.2019.12.025

Yin, Z.P., 2015. The Impact of Secondary Students’ Information Literacy on Career Development. Vocat. Educ. 22–24. https://doi.org/10.13565/j.cnki.issn2095-4530.2015.09.007

Yu, K., Yao, S.C., 2017. The Research on the Construction of the Connecting Course System of the Computer Specialty Based on the Comprehensive Information Literacy. Educ. Teach. Forum 248–249. https://kns-cnki-net-s.webvpn.wzvtc.cn/kcms2/article/abstract?v=WdAl4K16JyUYDaF5spdX0UNVI9ANR7mVgzmc1dmtUFIrZ3wRSNJbPzENKwQCYw2epOYGtKHj-bHC4WBrBN7Z5AepApLdZc4cXmugcYqqF-N23bgJ97zwH5xTQiF_xf6B5uBB9SCcfrk=&uniplatform=NZKPT&flag=copy

Yue, S.L., Zou, X.H., 2021. Research on Strategies for Improving Information Literacy of Students in Higher Vocational Colleges and Universities in the Era of Big Data. China New Telecommun. 23, 189–190. https://kns-cnki-net-s.webvpn.wzvtc.cn/kcms2/article/abstract?v=WdAl4K16JyX3Iv_yxXvvJeSdEtTF_e82YH8B_JlYEyfy_jSuKAXbLbZUlakZi9DQTehIDw-c2kfN4fNTYfOXW7JCuE7TJ6JuYYEhBQL4E3rxYPfEZarVFoHtYFghOD6hO8wb7ZBFoqg=&uniplatform=NZKPT&flag=copy

Zhang, J., 2014. Research on Information Literacy Education for Higher Vocational Students under Informatization Teaching Mode. Manag. Technol. SME 297–298. https://kns-cnki-net-s.webvpn.wzvtc.cn/kcms2/article/abstract?v=WdAl4K16JyVjAlncqchNV76QAT57R8WimVv9agUh8N929eQ6lxVJzXjG8Drx8NTCmtqlTzah-IQZEwP-IMJG6RdKiSG03LR40OkQHpU75X50tC_x2r44nlLvneDUkWRh&uniplatform=NZKPT&flag=copy

Zhang, X.H., 2020. Information Literacy of Students in Vocational Schools under the Background of Information Technology: Logic, Connotation and Cultivation Strategy. Vocat. Tech. Educ. 41, 31–36. https://kns-cnki-net-s.webvpn.wzvtc.cn/kcms2/article/abstract?v=WdAl4K16JyXFwTtiNdxa6yEVNUq3BC4WGqG2H0F67fZEFlZ3PtqAsS5hHgECIwfUAud0TSzDRjwkPotr11OMJK4voix5XoHsepx2-4hh4DadMCcQXQ_eRLZtkGkBw0Srqq6hs85o4kY=&uniplatform=NZKPT&flag=copy

Zhang, Z., 2020. Teaching Promotion Strategy of Information Technology Course in Secondary Vocational Schools Based on Information Literacy Training. Educ. Teach. Forum 340–341. https://kns-cnki-net-s.webvpn.wzvtc.cn/kcms2/article/abstract?v=WdAl4K16JyWbup9Gvq58NnjEOksSvwpqD6gC0KG4ZB1ebfE_-Ej20YrOT9BgSo2YB4I5Tf4VaIuNJDdNN85XSlvd66ROaZ1nnU7NRnZUk3ZJ-aKJGWcrYWsM27L2zQfPodb1wfAX67o=&uniplatform=NZKPT&flag=copy

Zhao, H.S., Chen, Y.L., 2016. The Connotation of Information Literacy and Self-improvement Strategies of Higher Vocational Counselors in the Informationization Era. Informatiz. Constr. 184+186. https://kns-cnki-net-s.webvpn.wzvtc.cn/kcms2/article/abstract?v=WdAl4K16JyV9Ouw_5A18Jt6vfm0ODi8u8bpH5AtNBW4YAyKbjSF8rmJkm29jN3JnVmUvY2_M_s3mp6l-KFysWxYoLvrSeGeoDbN_R13h_G621BSIHy1KF6H0kgL0BRRuoLfOYbZ0Jlw=&uniplatform=NZKPT&flag=copy

Zheng, B., 2022. The Promotion Path of Information Literacy of Enterprise Mentors Under Modern Apprenticeship System. J. Wenzhou Polytech. 22, 48–52. https://doi.org/10.13669/j.cnki.33-1276/z.2022.028

Zhu, T.T., 2021. Construction of the Evaluation System of Higher Vocational Students Information Literacy Ability under the “Double High Plan.” J. Acad. Libr. Inf. Sci. 32–37. https://kns-cnki-net-s.webvpn.wzvtc.cn/kcms2/article/abstract?v=WdAl4K16JyUcsNXhW00I9xqXJRQMIFYV8rwnOFInn5TFiWOTpq15Luf-gsMTq6Sa-RMKlDvTylKQzem1gV2rZe2DGfi2GXBxYHzkx66zi3OH2FDbalRVsml1DfQQTBOcHGVY89xA8-4=&uniplatform=NZKPT&flag=copy
